# Supplementary material for: An open-cage bis[60]fulleroid as an electron transport material for tin halide perovskite solar cells
Source: Royal Society of Chemistry journal article supplement (doi:10.1039/d3cc05843c), 2024-01-01
Supplement: d3cc05843c1.pdf [file d3cc05843c1.pdf]

Supplementary Information

**An open-cage bis[60]fulleroid as electron transport  
material for tin halide perovskite solar cells**

*Wentao Liu,<sup>‡a</sup> Guanglin Huang,<sup>‡a</sup> Chien-Yu Chen,<sup>‡a</sup> Tiancheng Tan,<sup>a</sup> Harata Fuyuki<sup>a</sup> Shuailfeng Hu,<sup>a</sup>  
Tomoya Nakumura,<sup>a</sup> Minh Anh Truong,<sup>a</sup> Richard Murdey,<sup>a</sup> Yoshifumi Hashikawa,<sup>a</sup> Yasujiro Murata,<sup>a\*</sup>  
and Atsushi Wakamiya<sup>a\*</sup>*

\*E-mail: [yasujiro@scl.kyoto-u.ac.jp](mailto:yasujiro@scl.kyoto-u.ac.jp), [wakamiya@scl.kyoto-u.ac.jp](mailto:wakamiya@scl.kyoto-u.ac.jp)

## **Author Contributions**

W. L., G. H., A.W., and Y.M. conceived the idea; G. H. synthesized and characterized the target compound and carried out UV, MS, HPLC, NMR measurements and DFT calculations; W. L. and C. C. fabricated the solar cell devices and measured the SEM, EQE, ideality factor, and stability; W. L., C. C. and R. M. measured AFM; G. H., T. T., and C. C. conducted CV measurements with the help of M. A. T.; C. C. and G. H. carried out the XPS measurements with the help of T. N. and F. H.; C. C. and G. H. conducted TGA measurements; C. C. and R.M. carried out EIS measurements; C. C. and F. H. conducted PL and TRPL measurements; C. C. carried out SCLC measurements; W. L., G. H., and C. C. prepared the manuscript. A. W., Y. M, R. M., Y. H., T. N., and S. H. edited and reviewed the manuscript; All authors commented on the manuscript; A. W. and Y. M. supervised the project.

## Experimental section

### Materials

Formamidinium iodide (FAI, 99.99%) and bathocuproine (BCP) were purchased from Tokyo Chemical Industry Co., Ltd. (TCI). Ammonium thiocyanate ( $\text{NH}_4\text{SCN}$ , 99.99% trace metals basis), tin(II) fluoride ( $\text{SnF}_2$ , 99%), and tin(II) iodide ( $\text{SnI}_2$ , beads, 99.99%, trace metals basis), ethane-1,2-diammonium iodide (ethylenediammonium diiodide,  $\text{EDAI}_2$ ,  $\geq 98\%$ ), and 1-chloronaphthalene (1-CINp) were purchased from Sigma-Aldrich Co., Ltd. (Sigma-Aldrich). Poly (3,4-ethylenedioxythiophene): poly (styrene sulfonate) (PEDOT:PSS) aqueous solution (Clevious PVP AI 4083) was purchased from Heraeus Co., Ltd. Fullerene  $\text{C}_{60}$  (sublimed, 99.99%) was purchased from ATR Company and Fullerene  $\text{C}_{60}$  (95%) for synthesis was purchased from SES Research Co. Phenyl- $\text{C}_{61}$ -butyric acid methyl ester (PCBM) and Indene- $\text{C}_{60}$  bisadduct (ICBA) was purchased from Ossila. Zinc oxide (ZnO) nanoparticle ink was purchased from Sigma-Aldrich. Dehydrated dimethyl sulfoxide (DMSO, super dehydrated), dehydrated orthodichlorobenzene (ODCB), carbon disulfide ( $\text{CS}_2$ ), dehydrated 1,2,4-trichlorobenzene (TCB), and acetonitrile were purchased from FUJIFILM Wako Pure Chemical Co., Ltd. Dimethylformamide (DMF), toluene, and chlorobenzene were purchased from Kanto Chemical. Co., Inc. Hexane and toluene were purchased from Nacalai Tesque, Inc. All of these solvents that were used for the fabrication of devices were degassed by Ar gas bubbling for 1 h and further dried with molecular sieves (3 Å) in an Ar-filled glove box ( $\text{H}_2\text{O}$ ,  $\text{O}_2 < 0.1$  ppm) before use. Open-cage bis[60]fulleroid (OC) was synthesized according to the literature.<sup>1</sup> Unless otherwise noted, materials purchased from commercial suppliers were used without further purification. All reactions were carried out under an Ar atmosphere. All the materials were used as received.

### Preparation of perovskite films

#### $\text{PEA}_{0.15}\text{FA}_{0.85}\text{SnI}_3$

0.8 M  $\text{PEA}_{0.15}\text{FA}_{0.85}\text{SnI}_3$  perovskite solution was prepared by dissolving PEAI (30.0 mg, 0.12 mmol), FAI (116.9 mg, 0.68 mmol),  $\text{SnI}_2$  (298.0 mg, 0.8 mmol)  $\text{SnF}_2$  (9.4 mg, 0.06

mmol) and  $\text{NH}_4\text{SCN}$  (3.0 mg, 0.04 mmol) in a mixed solvent of 0.8 mL DMF and 0.2 mL DMSO. The precursor solution was stirred at 70 °C for 1 h and filtered through a 0.20  $\mu\text{m}$  PTFE filter before spin-coating. After the precursor solution was cooled down to room temperature, 100  $\mu\text{L}$  of the precursor solution was spin-coated at 5000 rpm for 50 s with an acceleration of 1000 rpm  $\text{s}^{-1}$  (total time for spin-coating is 55 s). 500  $\mu\text{L}$  of toluene antisolvent was dripped onto the surface of the spinning substrate at 52 s during the spinning. Then, the substrate was immediately annealed on a 70 °C hot plate for 10 min. All the steps above were conducted in an Ar-filled glove box ( $\text{H}_2\text{O}$ ,  $\text{O}_2 < 0.1$  ppm).

### **$\text{FA}_{0.75}\text{MA}_{0.25}\text{SnI}_3$**

1.0 M  $\text{FA}_{0.75}\text{MA}_{0.25}\text{SnI}_3$  perovskite solution was prepared by dissolving FAI (129.0 mg, 0.75 mmol), MAI (39.8 mg, 0.25 mmol),  $\text{SnI}_2$  (372.6 mg, 1.0 mmol) and  $\text{SnF}_2$  (15.7 mg, 0.1 mmol) in 1.0 mL DMSO. The precursor solution was stirred at 45 °C for 1.5 h and filtered through a 0.20  $\mu\text{m}$  PTFE filter before spin-coating. After the precursor solution was cooled down to room temperature, 200  $\mu\text{L}$  of the precursor solution was spin-coated at 5000 rpm for 60 s with an acceleration of 1000 rpm  $\text{s}^{-1}$ . 300  $\mu\text{L}$  chlorobenzene (preheated to 65 °C) was used as antisolvent and dripped slowly onto the surface of spinning substrate at 2 s during the spin-coating step. The substrate was immediately annealed at 65 °C for over 10 min and then 100 °C for 10 min. All the steps above were conducted in an Ar-filled glove box ( $\text{H}_2\text{O} < 0.1$  ppm,  $\text{O}_2 < 0.1$  ppm).

### **Device fabrication**

Glass/ITO substrates (10  $\Omega$   $\text{sq}^{-1}$ , Geomatec Co., Ltd.) were etched with zinc powder and HCl (6 M in deionized water), then consecutively cleaned with water, acetone, detergent solution (Semico Clean 56, Furuuchi chemical), water, and isopropyl alcohol with 15 min ultrasonic bath under each step. Before coating the PEDOT:PSS, plasma treatment was applied to clean the substrates. PEDOT:PSS aqueous dispersion was filtered through a 0.45  $\mu\text{m}$  PTFE filter and then spin-coated on the ITO glass surface at 1000 rpm for 10 s and 4000 rpm for 30 s, and then annealed at 140 °C for 20 min under air. The substrates were transferred to an Ar-filled glove box ( $\text{H}_2\text{O}$ ,  $\text{O}_2 < 0.1$  ppm) and annealed at 140 °C for another 20 min. The perovskite layer was fabricated on PEDOT:PSS following the above-mentioned procedure. For  $\text{EDA}\text{I}_2$  post-treatment, 1.0 mg  $\text{EDA}\text{I}_2$  was added to 1.0

mL IPA and 1.0 mL toluene. The mixed solution was stirred at 70 °C for 3h and then filtered through a 0.20 μm PTFE filter before spin coating. After that, 150 μL solution was dynamically spin-coated onto perovskite films. The spin coating process was set as 4000 rpm for 20 s with an acceleration of 1333 rpm s<sup>-1</sup>. Following spin coating, the films were immediately annealed at 70 °C for around 5 min. Subsequently, 15 mg mL<sup>-1</sup> solution of PCBM, OC or ICBA in CB/CS<sub>2</sub>/TCB (10/5/1, v/v) was spin-coated at 2000 rpm for 30 s, followed by annealing at 70 °C for 10 min. 8 nm of bathocuproine (0.01 nm s<sup>-1</sup>) was then deposited by thermal evaporation. Finally, 100 nm of Ag was deposited through a shadow mask to form the metal electrode. The deposition rate for Ag was set as 0.003 nm s<sup>-1</sup> until the thickness reached 5 nm, then 0.01 nm s<sup>-1</sup> until 20 nm, and finally 0.08 nm s<sup>-1</sup> until the target thickness was reached. The overlap area of the bottom ITO and the uppermost silver electrode of the devices was 0.15 cm<sup>2</sup>.

The device for electron-only devices for SCLC (space-charge limited current) measurements adopted the device structures of glass/ITO/ZnO/ETM/BCP/Ag. ZnO was filtered through a 0.45 μm PTFE filter and then spin-coated on the plasma-treated ITO glass at 3000 rpm for 30 s, followed by thermal annealing at 200 °C for 30 min under air. After the samples were transferred to an Ar-filled glove box, 30 mg mL<sup>-1</sup> solution of PCBM, OC, or ICBA in CB/CS<sub>2</sub>/TCB (10/5/1, v/v) was filtrated through 0.20 μm PTFE filters. The filtrated solutions were subsequently spin-coated at 2000 rpm for 30 s on the ITO/ZnO samples, followed by thermal annealing at 70 °C for 10 min. We note that the concentration of 30 mg mL<sup>-1</sup> is slightly higher than the solubility of OC in CB/CS<sub>2</sub>/TCB (10/5/1, v/v) so the OC solution formed a saturated solution. Lastly, BCP and Ag were deposited using the same procedure employed for the fabrication of solar cells. The overlap area of the bottom ITO and the uppermost silver electrode of the devices is 0.15 cm<sup>2</sup>.

For the measurements of photoluminescence (PL) and time-resolved photoluminescence (TRPL), the perovskite and perovskite/ETM samples were prepared using the same procedure employed for the fabrication of the solar cells, except the substrate was changed to plasma-treated quartz.

## **Characterization**

Scanning electron microscopy (SEM) was performed with a Hitachi S8010 ultra-high-resolution scanning electron microscope (Hitachi High-Tech Corporation). Atomic force microscopy (AFM) was performed with a Picoscan Plus AFM instrument used in AC-mode with Nanoworld NCST probes. UV–vis absorption measurement was performed with a JASCO V-780 spectrophotometer.

Cyclic voltammetry (CV) of thin film was performed on an ALS/chi-620C electrochemical analyzer using a three-electrode cell with an ETMs-adsorbed ITO working electrode, a Pt wire counter electrode, and an Ag/AgNO<sub>3</sub> reference electrode. The films of ETMs were spin-coated on a plasma-treated ITO surface (condition: 15 mg mL<sup>-1</sup> CB/CS<sub>2</sub>/TCB (10/5/1, v/v) solution of ETMs, 2000 rpm). The measurements were carried out using acetonitrile solution of 0.1 M tetrabutylammonium hexafluorophosphate (*n*Bu<sub>4</sub>NPF<sub>6</sub>) as a supporting electrolyte. The redox potentials were calibrated with ferrocene as an internal standard. The area of the working electrode dipped into the electrolyte solution is 0.9 cm × 1.25 cm. The measurement of CV in solutions was performed on an ALS/chi-620C electrochemical analyzer using a three-electrode cell with a glassy carbon working electrode, a platinum wire counter electrode, and an Ag/AgNO<sub>3</sub> reference electrode. The measurements were carried out using 1 mM solutions of ETMs and 0.1 M tetrabutylammonium tetrafluoroborate (TBABF<sub>4</sub>) as a supporting electrolyte, and the potentials were calibrated with ferrocene used as an internal standard which was added after each measurement. The CV measurements were carried out under an argon atmosphere.

Photocurrent–voltage (*J–V*) curves were measured in an N<sub>2</sub>-filled glove box (H<sub>2</sub>O, O<sub>2</sub> <0.1 ppm) with an OTENTO-SUN-P1G solar simulator (Bunkoukeiki Co., Ltd.). The light intensity of the illumination source was calibrated using a standard silicon photodiode. The active area of the devices was 0.0985 cm<sup>2</sup> as defined by the aperture of the shadow mask placed between the light source and test cells.

Each device was measured with a 10-mV voltage step and a 100 ms time step (i.e., scan rate of 0.1 V s<sup>-1</sup>) using a Keithley 2400 source meter.

External quantum efficiency (EQE) were measured with a Bunkoukeiki SMO-250III system equipped with a Bunkoukeiki SM-250 diffuse reflection unit (Bunkoukeiki Co.,

Ltd.). The incident light intensity was calibrated with a standard SiPD S1337-1010BQ silicon photodiode.

Impedance spectroscopy data was obtained with an E4990A impedance analyzer (Keysight) with an oscillator voltage of 30mV, in the frequency range of 20-200,000 Hz. The measurements were performed with the devices exposed to AM1.5G-equivalent radiation in an inert atmosphere, with a 0.1 cm<sup>2</sup> shadow mask. The impedance data was fit by a series resistor ( $r_s$ ) along with a capacitor ( $c_p$ ) in parallel with a resistor ( $r_p$ ).

SCLC measurements were measured in the dark in a glove box with a Keithley 2400 source meter. The electrons were injected from BCP/Ag and collected at ITO/ZnO. The voltage was increased logarithmically scanning from low to high voltage. The SCLC

electron mobility of the ETMs was fitted using the Mott–Gurney equation<sup>2,3</sup>  $J = \frac{9}{8} \epsilon_0 \epsilon_r \mu_e V^2 d^{-3}$ , where  $J$ ,  $\epsilon_0$ ,  $\epsilon_r$ ,  $\mu_e$ ,  $V$ ,  $d$  are the current density of the device, vacuum permittivity ( $8.854 \times 10^{-12}$  F/m), relative permittivity of the ETM, SCLC electron mobility, bias voltage, and the thickness of the ETM, respectively. The  $\epsilon_r$  values were assumed to be 3 for all ETMs. The thicknesses were 77 nm, 67 nm, and 86 nm for PCBM, OC, and ICBA, respectively, determined based on their respective cross-sectional SEM images.

For the PL and TRPL measurements, the samples were excited from the substrate side by a picosecond pulsed light with a wavelength of 688 nm (Advanced Laser Diode System). The excitation fluence was set at 100 nJ cm<sup>-2</sup>. The PL spectra were collected from the substrate side and were recorded using an N<sub>2</sub>-cooled charge-coupled-device array equipped with a monochromator (Princeton Instruments). The TRPL signals were recorded using an avalanche photodiode (ID Quantique) and a time-correlated single photon counting board (PicoQuant). The TRPL traces were fitted with a double exponential function  $PL(t) = A_1 \exp(-t/\tau_1) + A_2 \exp(-t/\tau_2)$ , and the average PL lifetimes were calculated using the equation  $\tau_{avg} = (A_1 \tau_1^2 + A_2 \tau_2^2)/(A_1 \tau_1 + A_2 \tau_2)$ . During the measurement, the samples were kept in an Ar-filled metallic box with quartz windows to avoid oxygen contamination and degradation.

The <sup>1</sup>H measurements were carried out at room temperature (unless otherwise noted) with JEOL JNM ECA500 and Bruker Advance III 400 spectrometer. The NMR chemical shifts

were reported in ppm with reference to residual protons and carbons of acetone- $d_6$  ( $\delta$  2.05 ppm in  $^1\text{H}$  NMR) and DMSO- $d_6$  ( $\delta$  2.50 ppm in  $^1\text{H}$  NMR). Atmospheric pressure chemical ionization (APCI) mass spectra were measured on a Bruker micrOTOF-Q II. The high-performance liquid chromatography (HPLC) was performed with the use of a Cosmosil Buckyprep column (250 mm in length, 4.6 mm in inner diameter) for analytical purpose and the same columns (two directly connected columns; 250 mm in length, 20 mm in inner diameter) for preparative purpose. Column chromatography was performed using PSQ 60B (Fuji Silysia). XPS was recorded with a JPS-9010 (JEOLCo.,Ltd.) instrument, with an X-ray energy of 1.5 keV ( $\text{Al K}\alpha$ ), a step of 0.1 eV, and a dwell time of 200 ms. The perovskite film samples were transferred to the XPS chamber through an Ar-filled transfer vessel in order to avoid oxygen contamination.

### **Computational Methods**

Theoretical calculations were performed using the Gaussian 09 software package. Ground state structures were optimized at the B3LYP-D3/6-31G(d,p) level of theory without any symmetry assumptions and confirmed by frequency analyses at the same level of theory.

### **Synthesis of OC**

The purity of OC in this study was confirmed by the  $^1\text{H}$  NMR and MS data shown below.



## Supplementary Figures and Tables

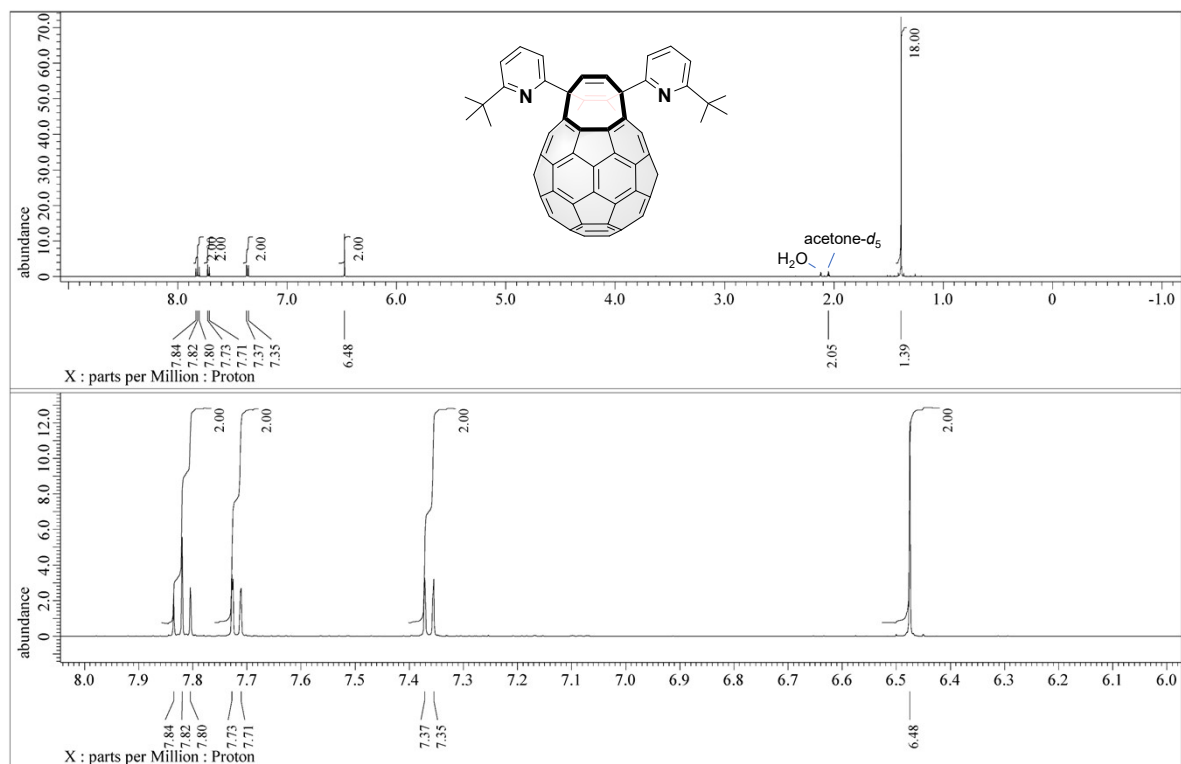

**Figure S1.**  $^1\text{H}$  NMR spectra (500 MHz,  $\text{CS}_2/\text{acetone-}d_6$  (5:1)) of OC.

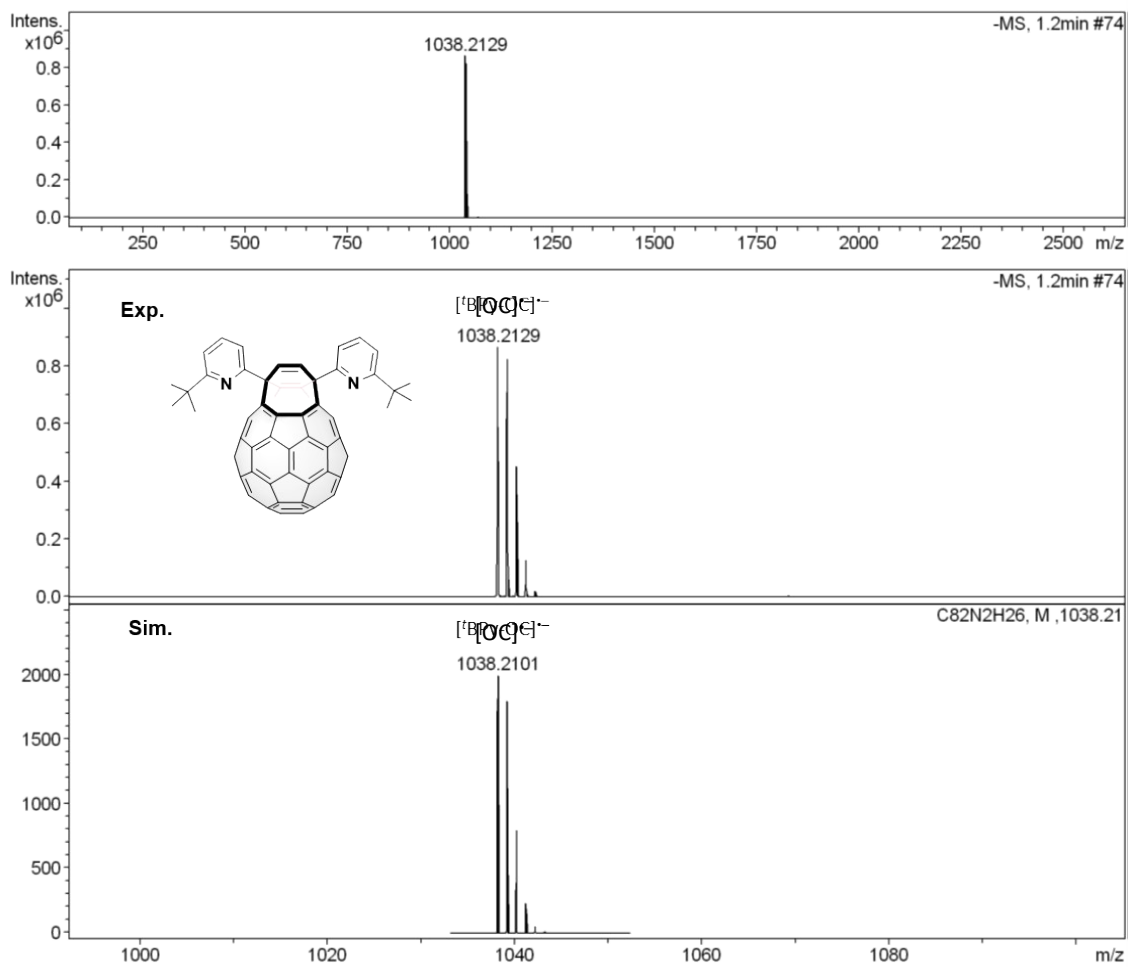

**Figure S2.** APCI mass spectra (negative ionization mode) of OC.

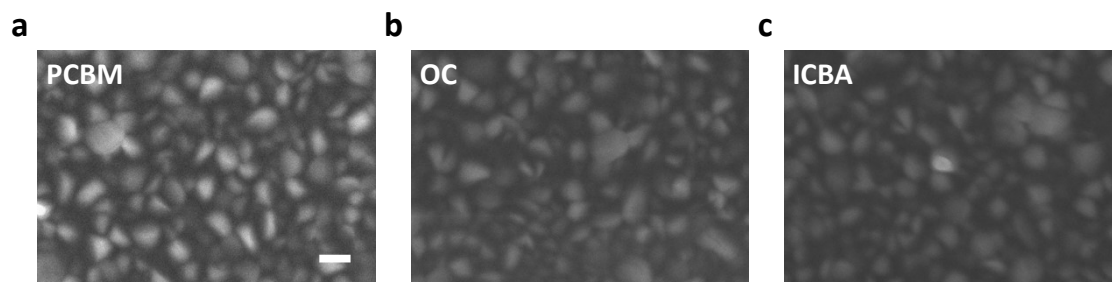

**Figure S3.** Top view SEM images of (a) PCBM, (b) OC, and (c) ICBA films grown on Sn-based perovskite layers (scale bar is 2  $\mu\text{m}$ ).

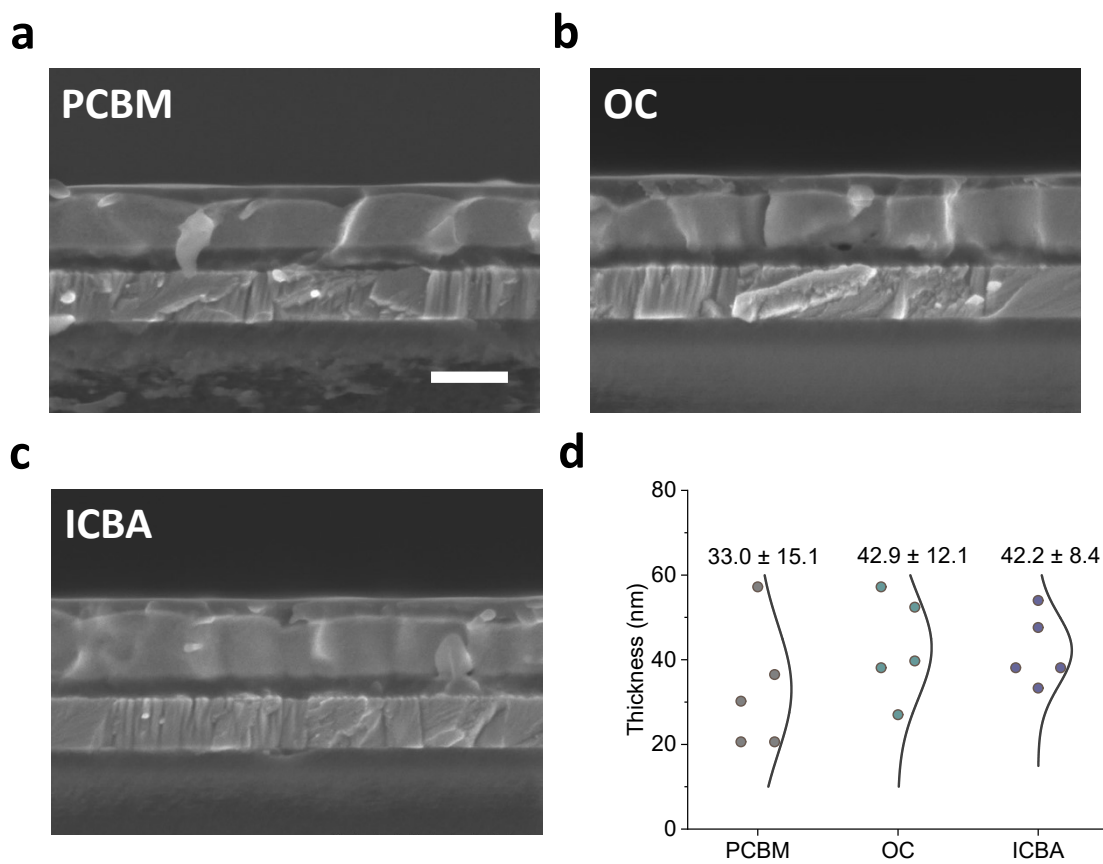

**Figure S4.** Cross section SEM images of (a) PCBM, (b) OC, and (c) ICBA films fabricated onto Sn-based perovskite layers (The scale bar is 500 nm). (d) The average thickness of the PCBM, OC and ICBA films estimated from SEM images.

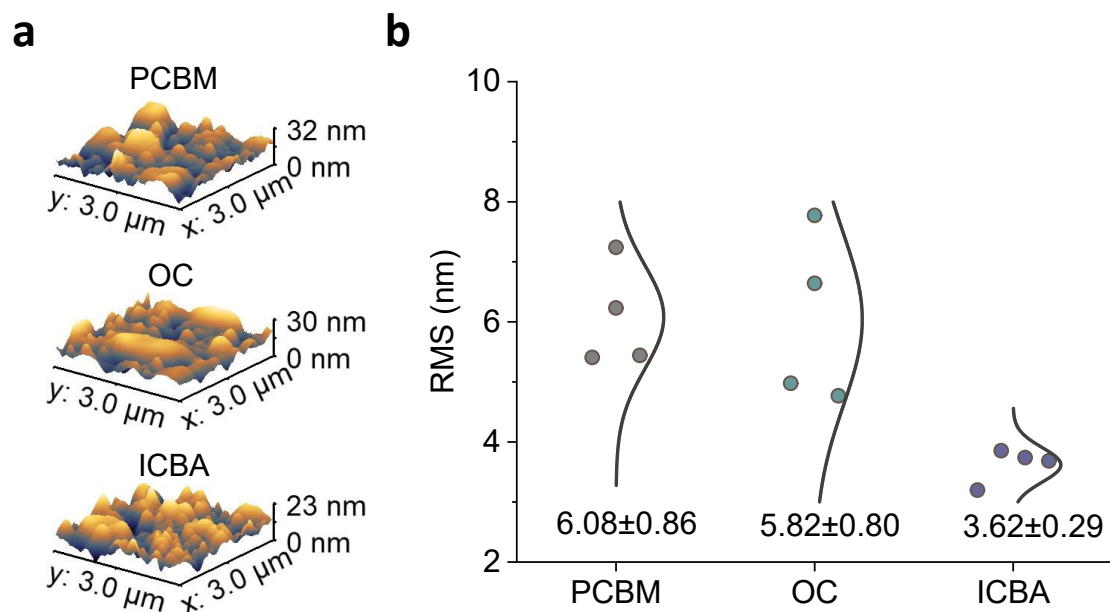

**Figure S5.** (a) AFM images and (b) the root-mean-square roughness of PCBM, OC and ICBA-covered perovskite samples.

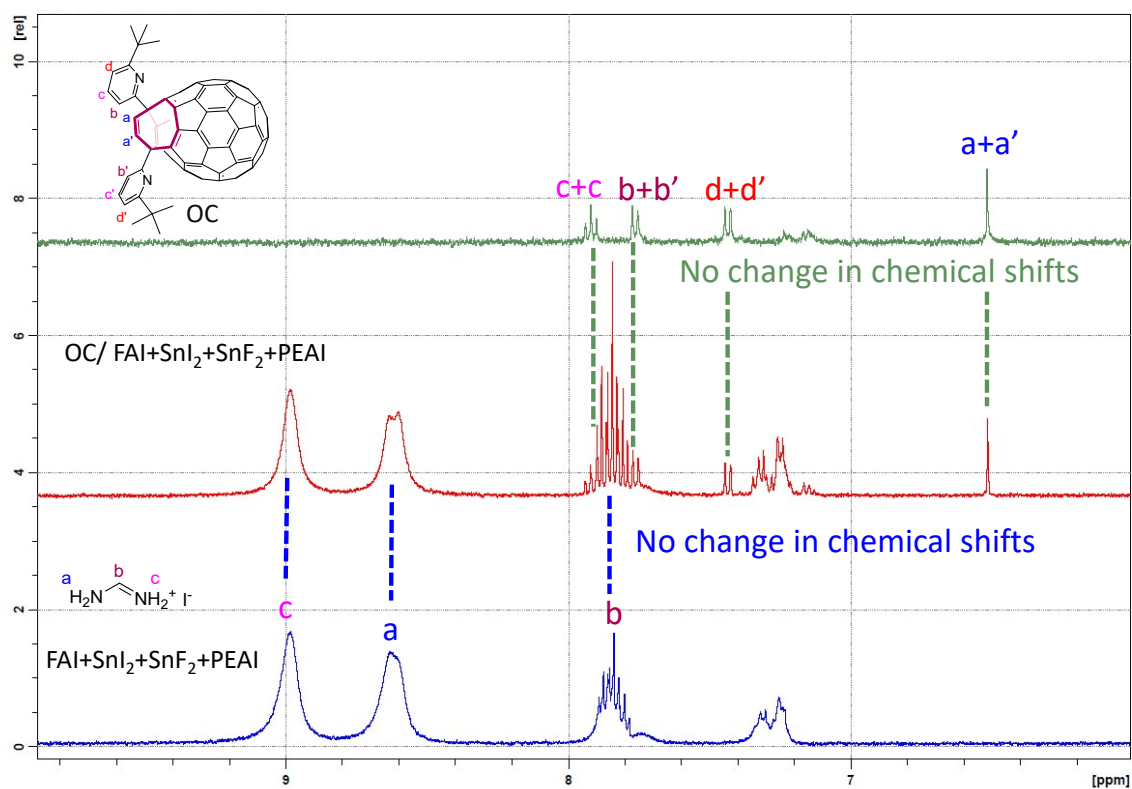

**Figure S6.**  $^1\text{H}$  NMR spectra (500 MHz,  $\text{DMSO-}d_6/\text{CS}_2(2:1)$ ) of OC, OC mixed with (FAI+SnI<sub>2</sub>+SnF<sub>2</sub>+PEAI), and mixture of (FAI+SnI<sub>2</sub>+SnF<sub>2</sub>+PEAI).

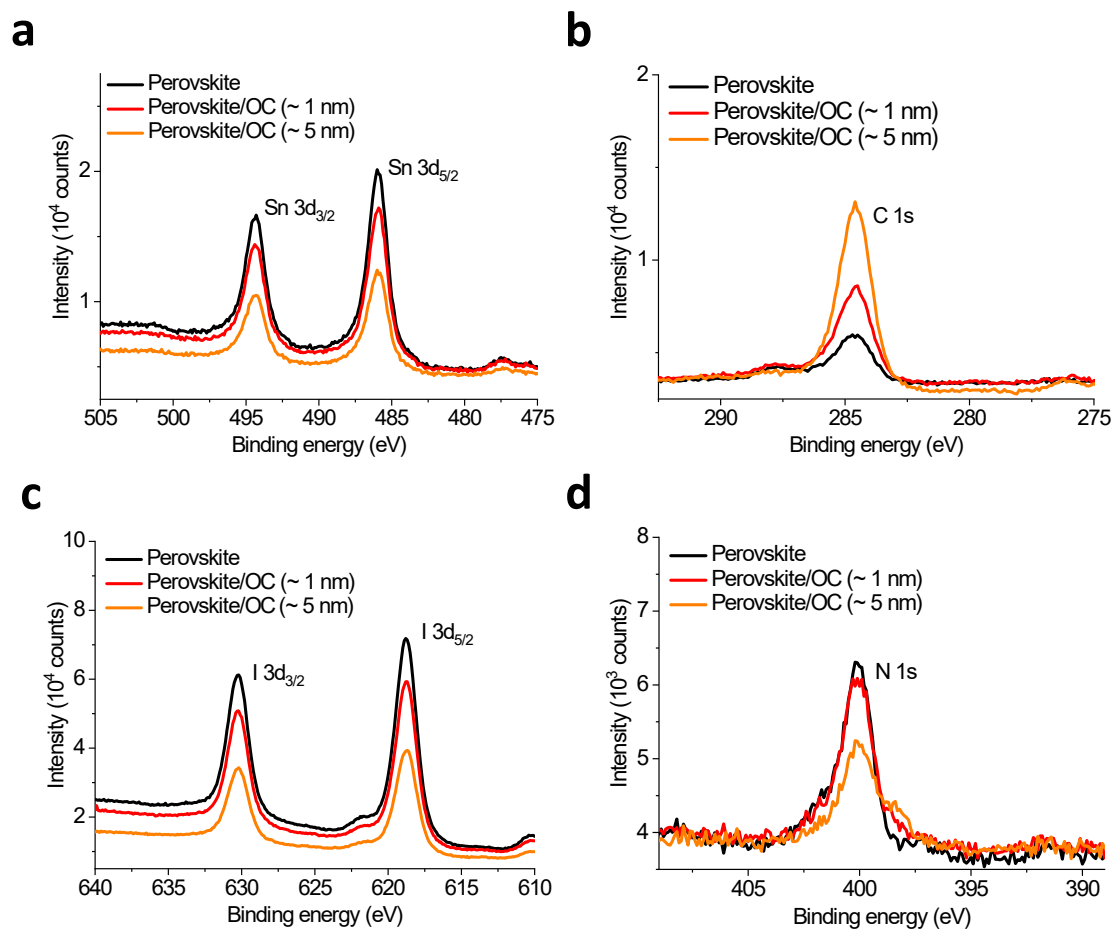

**Figure S7.** XPS spectra of the (a) Sn ( $3d_{3/2}$  and  $3d_{5/2}$ ), (b) C  $1s$ , (c) I ( $3d_{3/2}$  and  $3d_{5/2}$ ), and (d) N  $1s$  core levels for the bare perovskite films and perovskite films treated with 1 or 5 nm OC.

**Table S1.** Champion and average PV parameters of PSCs from a single batch of six solar cells.

| Molecule for<br>ETM | $J_{SC}$ (mA cm <sup>-2</sup> ) <sup>a</sup> | $V_{OC}$ (V) <sup>a</sup> | FF <sup>a</sup>       | PCE (%) <sup>a</sup> |
|---------------------|----------------------------------------------|---------------------------|-----------------------|----------------------|
| <b>PCBM</b>         | 17.7<br>(18.4 ± 1.3)                         | 0.57<br>(0.48 ± 0.04)     | 0.52<br>(0.48 ± 0.03) | 5.3<br>(4.3 ± 0.5)   |
| <b>OC</b>           | 19.6<br>(18.9 ± 0.7)                         | 0.72<br>(0.69 ± 0.06)     | 0.68<br>(0.65 ± 0.04) | 9.6<br>(8.5 ± 0.8)   |
| <b>ICBA</b>         | 20.7<br>(20.3 ± 0.4)                         | 0.82<br>(0.76 ± 0.05)     | 0.69<br>(0.67 ± 0.03) | 11.6<br>(10.4 ± 0.7) |

<sup>a</sup> The average and standard deviation values are given in parentheses.



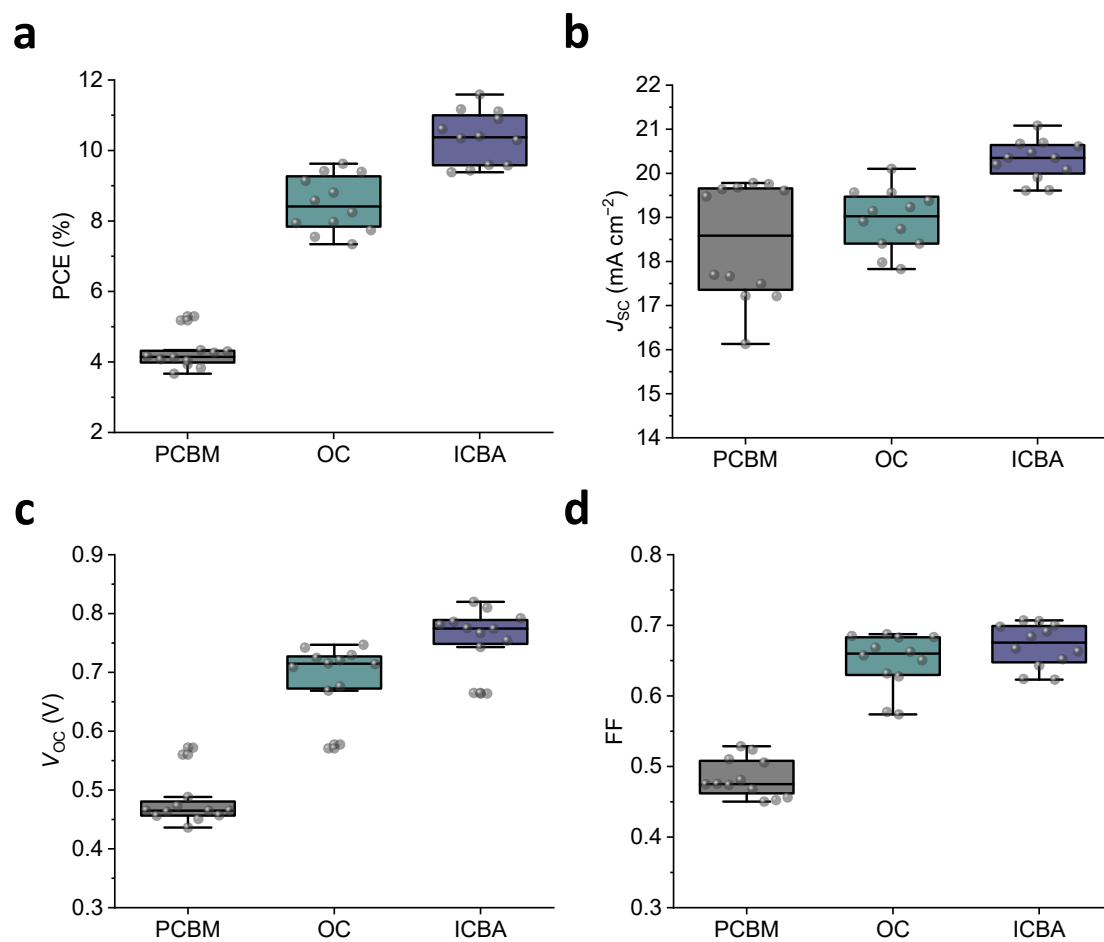

**Figure S8.** Distributions of (a) PCE, (b)  $J_{sc}$ , (c)  $V_{oc}$ , and (d) FF values derived for six devices with PCBM, OC, and ICBA. The data includes values derived from both forward and reverse  $J$ - $V$  scans.

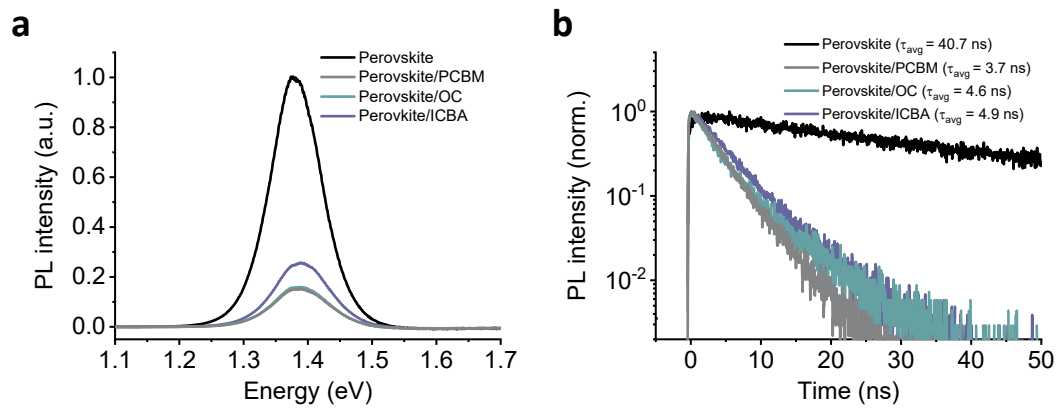

**Figure S9.** (a) PL and (b) TRPL spectra of perovskite and perovskite/ETM thin films deposited on quartz substrates. Here, the perovskite with ICBA on top shows the highest PL intensity and the longest TRPL lifetime, followed by those with OC and PCBM.

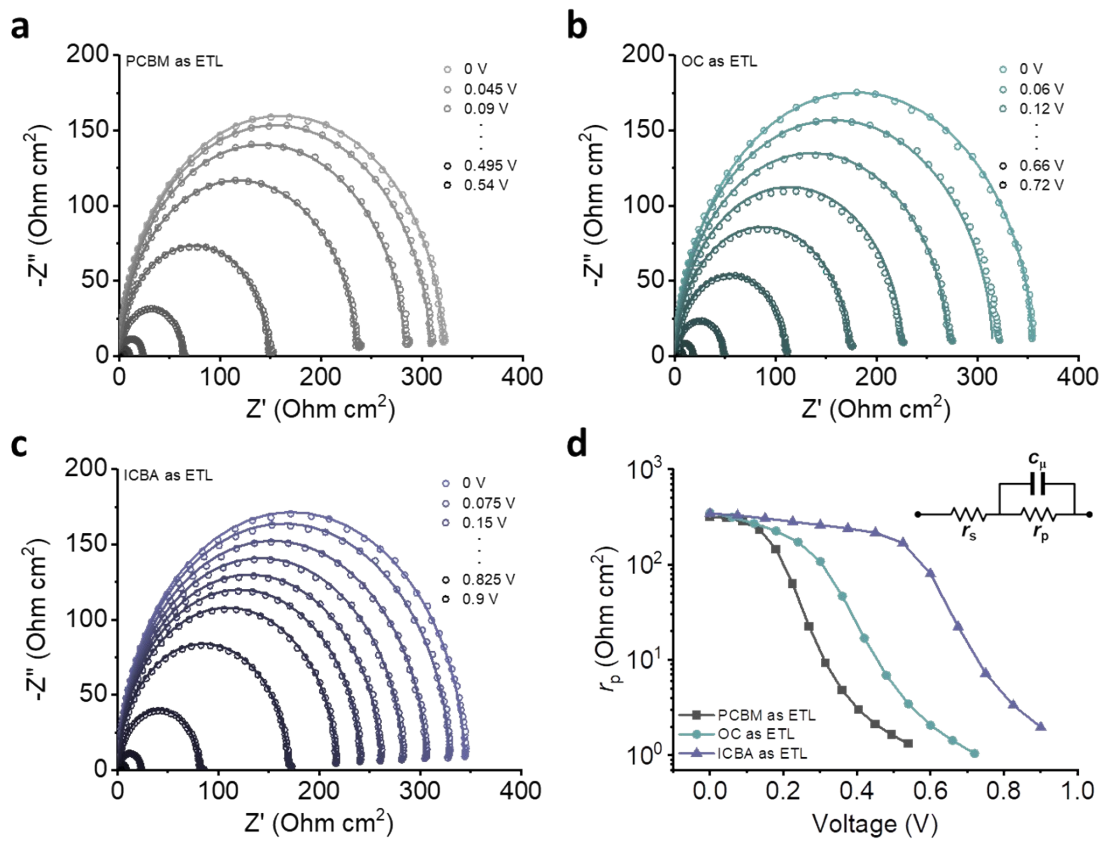

**Figure S10.** Impedance spectra of  $\text{PEA}_{0.15}\text{FA}_{0.85}\text{SnI}_3$  solar cells using (a) PCBM, (b) OC, and (c) ICBA as ETMs under AM1.5G-equivalent radiation. Symbols and the solid lines represent the measured data and fitted results, respectively. (d) Fitted  $r_p$  as functions of bias voltage for the solar cells using PCBM, OC, and ICBA as ETMs. Inset: the equivalent circuit used to model the data. Here,  $r_s$  is governed by the measurement-related electrical contact, such as the electrodes of the devices, and the values of the  $r_s$  are almost identical ( $\approx 1 \Omega \text{ cm}^2$ ) for all devices.  $r_p$  is inversely correlated with the degree of carrier recombination in the solar cells.

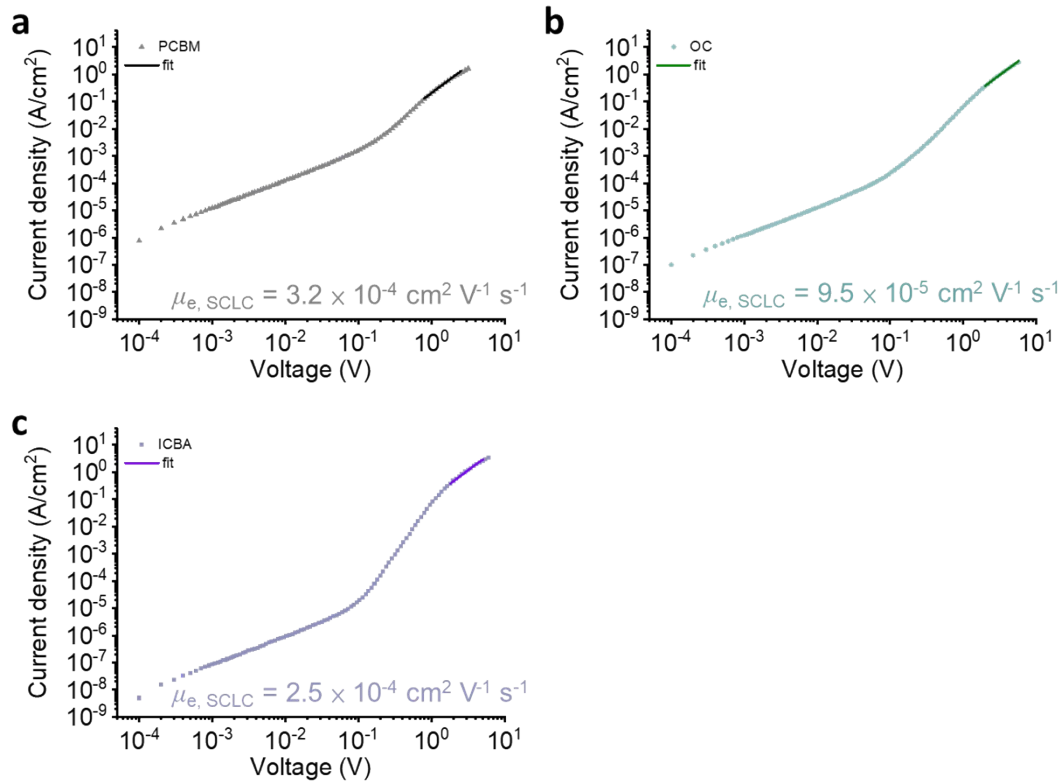

**Figure S11.** Dark  $J$ - $V$  curves of the (a) PCBM-, (b) OC-, and (c) ICBA-based electron-only devices. Solid lines represent fit to the data according to Mott–Gurney equation  $J \propto \mu_e V^2$ , where  $\mu_e$  and  $V$  stand for SCLC electron mobility and applied voltage, respectively. The SCLC electron mobility of the ETMs was fitted using the Mott–Gurney equation<sup>2,3</sup>

$$J = \frac{9}{8} \varepsilon_0 \varepsilon_r \mu_e V^2 d^{-3}$$

where  $J$ ,  $\varepsilon_0$ ,  $\varepsilon_r$ ,  $\mu_e$ ,  $V$ ,  $d$  are the current density of the device, vacuum permittivity ( $8.854 \times 10^{-12}$  F/m), relative permittivity of the ETM, SCLC electron mobility, bias voltage, and the thickness of the ETM, respectively. The  $\varepsilon_r$  values were assumed to be 3 for all ETMs. The thicknesses were 77 nm, 67 nm, and 86 nm for PCBM, OC, and ICBA, respectively, determined based on their respective cross-sectional SEM images.

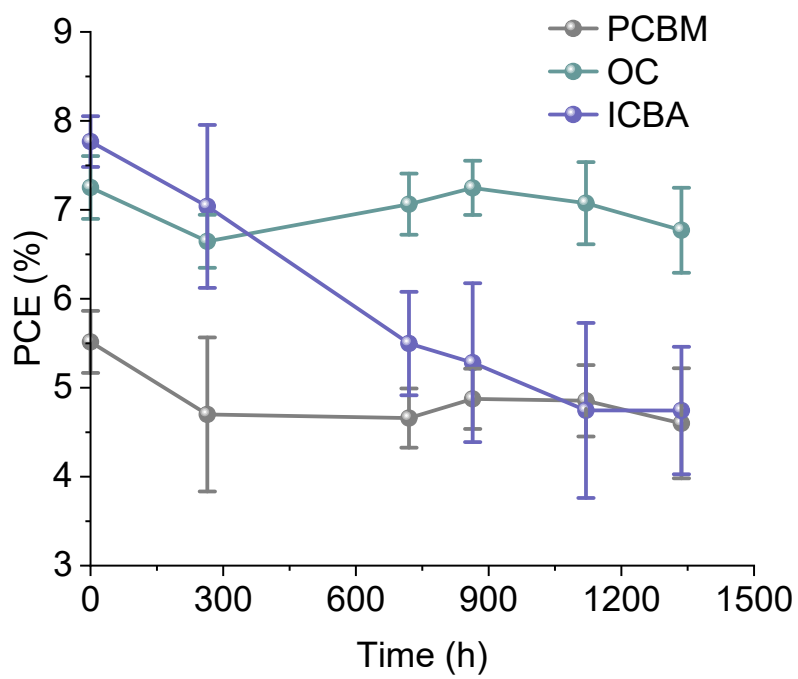

**Figure S12.** Shelf-stability of unencapsulated cells with PCBM, OC, and ICBA. For this test, devices were stored in the dark in an N<sub>2</sub>-filled glove box. The error bars represent the standard deviation. The data includes values derived from both forward and reverse  $J-V$  scans of three devices for each ETM.

**Table S2.** Optimized geometry of PCBM (B3LYP-D3/6-31G(d,p)).

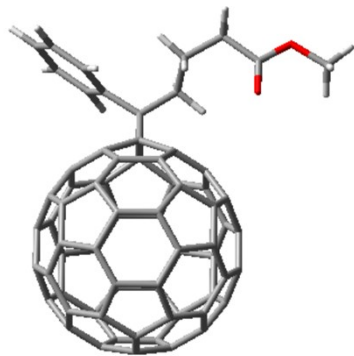

Standard orientation:

| Center Number | Atomic Number | Atomic Type | Coordinates (Angstroms) |           |           |
|---------------|---------------|-------------|-------------------------|-----------|-----------|
|               |               |             | X                       | Y         | Z         |
| 1             | 8             | 0           | 4.645292                | -3.076925 | 0.464821  |
| 2             | 8             | 0           | 6.690016                | -3.672116 | -0.286818 |
| 3             | 6             | 0           | 2.074149                | 0.851686  | -1.024500 |
| 4             | 6             | 0           | 2.235488                | 0.586561  | 0.563325  |
| 5             | 6             | 0           | 1.427233                | 1.478250  | 1.446103  |
| 6             | 6             | 0           | 0.709911                | 2.566930  | 0.977432  |
| 7             | 6             | 0           | 0.563306                | 2.809561  | -0.470872 |
| 8             | 6             | 0           | 1.140628                | 1.955533  | -1.396972 |
| 9             | 6             | 0           | 0.377922                | 1.537927  | -2.548141 |
| 10            | 6             | 0           | 0.670208                | 0.141438  | -2.811704 |
| 11            | 6             | 0           | 1.618236                | -0.321400 | -1.827194 |
| 12            | 6             | 0           | 1.483191                | -1.596796 | -1.300336 |
| 13            | 6             | 0           | 1.631624                | -1.839091 | 0.147956  |
| 14            | 6             | 0           | 1.910876                | -0.798633 | 1.018669  |
| 15            | 6             | 0           | 1.189005                | -0.708968 | 2.264873  |
| 16            | 6             | 0           | 0.894372                | 0.687298  | 2.527716  |
| 17            | 6             | 0           | -0.297104               | 1.044107  | 3.164703  |
| 18            | 6             | 0           | -1.033446               | 2.193876  | 2.695273  |
| 19            | 6             | 0           | -0.541692               | 2.930249  | 1.611973  |
| 20            | 6             | 0           | -1.457027               | 3.396292  | 0.585258  |
| 21            | 6             | 0           | -0.776495               | 3.316556  | -0.695497 |
| 22            | 6             | 0           | -1.495632               | 2.953016  | -1.839165 |
| 23            | 6             | 0           | -0.903617               | 2.040446  | -2.788561 |
| 24            | 6             | 0           | -1.947005               | 1.161769  | -3.292049 |
| 25            | 6             | 0           | -1.665983               | -0.180209 | -3.545007 |
| 26            | 6             | 0           | -0.329712               | -0.700473 | -3.305028 |
| 27            | 6             | 0           | -0.450448               | -2.040529 | -2.780279 |
| 28            | 6             | 0           | 0.434281                | -2.471745 | -1.786484 |
| 29            | 6             | 0           | -0.065174               | -3.251107 | -0.667424 |
| 30            | 6             | 0           | 0.671125                | -2.857230 | 0.521153  |
| 31            | 6             | 0           | 0.013045                | -2.799346 | 1.754151  |
| 32            | 6             | 0           | 0.278442                | -1.697162 | 2.648175  |
| 33            | 6             | 0           | -0.967479               | -1.325093 | 3.299322  |
| 34            | 6             | 0           | -1.249232               | 0.016538  | 3.553501  |
| 35            | 6             | 0           | -2.584188               | 0.538126  | 3.317691  |
| 36            | 6             | 0           | -2.450266               | 1.885751  | 2.786637  |
| 37            | 6             | 0           | -3.326147               | 2.333847  | 1.797344  |
| 38            | 6             | 0           | -2.819465               | 3.109886  | 0.676444  |
| 39            | 6             | 0           | -3.561517               | 2.720099  | -0.512039 |
| 40            | 6             | 0           | -2.912195               | 2.643948  | -1.744586 |
| 41            | 6             | 0           | -3.191974               | 1.535570  | -2.643969 |
| 42            | 6             | 0           | -4.106882               | 0.548473  | -2.273120 |
| 43            | 6             | 0           | -3.813816               | -0.851491 | -2.537173 |
| 44            | 6             | 0           | -2.617331               | -1.208658 | -3.161478 |
| 45            | 6             | 0           | -1.864735               | -2.359851 | -2.688265 |
| 46            | 6             | 0           | -2.341200               | -3.107419 | -1.610789 |
| 47            | 6             | 0           | -1.421310               | -3.567643 | -0.582474 |
| 48            | 6             | 0           | -2.105703               | -3.494158 | 0.698534  |
| 49            | 6             | 0           | -1.401880               | -3.117565 | 1.842967  |
| 50            | 6             | 0           | -2.009085               | -2.205630 | 2.799765  |

|    |   |   |           |           |           |                                                                                         |   |   |          |           |           |
|----|---|---|-----------|-----------|-----------|-----------------------------------------------------------------------------------------|---|---|----------|-----------|-----------|
| 51 | 6 | 0 | -3.292663 | -1.706086 | 2.571928  | 87                                                                                      | 1 | 0 | 5.358858 | -5.037266 | -1.143652 |
| 52 | 6 | 0 | -3.586162 | -0.306233 | 2.836073  | 88                                                                                      | 1 | 0 | 7.040493 | -5.590091 | -0.836658 |
| 53 | 6 | 0 | -4.497512 | 0.163061  | 1.807027  | -----                                                                                   |   |   |          |           |           |
| 54 | 6 | 0 | -4.370496 | 1.457597  | 1.299649  | The total electronic energy $E$ was calculated to be $-2902.51156006$ Hartree. The      |   |   |          |           |           |
| 55 | 6 | 0 | -4.516076 | 1.696438  | -0.128281 | frequency calculations using the optimized structure showed no imaginary frequency. The |   |   |          |           |           |
| 56 | 6 | 0 | -4.783076 | 0.631017  | -0.990213 | LUMO level is $-0.10977$ a.u. ( $-2.99$ eV).                                            |   |   |          |           |           |
| 57 | 6 | 0 | -4.909817 | -0.717012 | -0.461227 |                                                                                         |   |   |          |           |           |
| 58 | 6 | 0 | -4.770011 | -0.946097 | 0.907908  |                                                                                         |   |   |          |           |           |
| 59 | 6 | 0 | -4.023647 | -2.100586 | 1.380324  |                                                                                         |   |   |          |           |           |
| 60 | 6 | 0 | -3.441582 | -2.977881 | 0.463383  |                                                                                         |   |   |          |           |           |
| 61 | 6 | 0 | -3.587369 | -2.739026 | -0.964608 |                                                                                         |   |   |          |           |           |
| 62 | 6 | 0 | -4.308928 | -1.632572 | -1.417011 |                                                                                         |   |   |          |           |           |
| 63 | 6 | 0 | 3.399148  | 1.000992  | -0.306877 |                                                                                         |   |   |          |           |           |
| 64 | 6 | 0 | 3.941205  | 2.398578  | -0.145681 |                                                                                         |   |   |          |           |           |
| 65 | 6 | 0 | 4.179114  | 3.185024  | -1.279345 |                                                                                         |   |   |          |           |           |
| 66 | 6 | 0 | 4.745924  | 4.453084  | -1.156903 |                                                                                         |   |   |          |           |           |
| 67 | 6 | 0 | 5.082415  | 4.949830  | 0.104593  |                                                                                         |   |   |          |           |           |
| 68 | 6 | 0 | 4.849111  | 4.172021  | 1.239838  |                                                                                         |   |   |          |           |           |
| 69 | 6 | 0 | 4.280634  | 2.903403  | 1.114464  |                                                                                         |   |   |          |           |           |
| 70 | 6 | 0 | 4.478019  | -0.048285 | -0.587367 |                                                                                         |   |   |          |           |           |
| 71 | 6 | 0 | 5.379955  | -0.316474 | 0.623738  |                                                                                         |   |   |          |           |           |
| 72 | 6 | 0 | 6.414913  | -1.410372 | 0.349867  |                                                                                         |   |   |          |           |           |
| 73 | 6 | 0 | 5.790721  | -2.785124 | 0.190658  |                                                                                         |   |   |          |           |           |
| 74 | 6 | 0 | 6.200196  | -5.015979 | -0.445160 |                                                                                         |   |   |          |           |           |
| 75 | 1 | 0 | 3.906539  | 2.801082  | -2.259078 |                                                                                         |   |   |          |           |           |
| 76 | 1 | 0 | 4.919578  | 5.055013  | -2.044763 |                                                                                         |   |   |          |           |           |
| 77 | 1 | 0 | 5.519815  | 5.939717  | 0.201943  |                                                                                         |   |   |          |           |           |
| 78 | 1 | 0 | 5.104364  | 4.553070  | 2.224912  |                                                                                         |   |   |          |           |           |
| 79 | 1 | 0 | 4.087968  | 2.303130  | 1.998876  |                                                                                         |   |   |          |           |           |
| 80 | 1 | 0 | 4.015279  | -0.987347 | -0.897569 |                                                                                         |   |   |          |           |           |
| 81 | 1 | 0 | 5.079673  | 0.309123  | -1.433478 |                                                                                         |   |   |          |           |           |
| 82 | 1 | 0 | 4.755893  | -0.622499 | 1.471188  |                                                                                         |   |   |          |           |           |
| 83 | 1 | 0 | 5.899151  | 0.603526  | 0.913861  |                                                                                         |   |   |          |           |           |
| 84 | 1 | 0 | 7.007871  | -1.192188 | -0.546710 |                                                                                         |   |   |          |           |           |
| 85 | 1 | 0 | 7.135786  | -1.479401 | 1.175422  |                                                                                         |   |   |          |           |           |
| 86 | 1 | 0 | 5.870355  | -5.420659 | 0.515898  |                                                                                         |   |   |          |           |           |

**Table S3.** Optimized geometry of OC (B3LYP-D3/6-31G(d,p)).

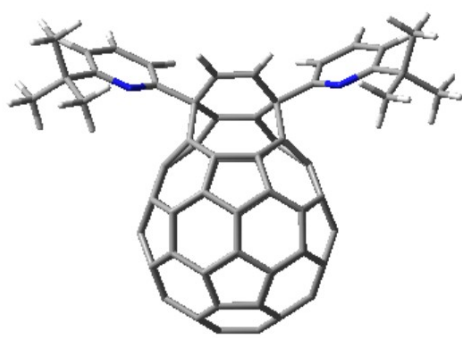

|    |   |   |           |           |           |
|----|---|---|-----------|-----------|-----------|
| 18 | 6 | 0 | -0.004399 | -2.099851 | -3.276554 |
| 19 | 6 | 0 | -1.102461 | -2.797185 | -2.936165 |
| 20 | 6 | 0 | -2.180583 | -2.145177 | -2.461239 |
| 21 | 6 | 0 | -2.845097 | -2.651712 | -1.407115 |
| 22 | 6 | 0 | -2.449932 | -3.804963 | -0.837140 |
| 23 | 6 | 0 | -1.366834 | -4.448737 | -1.312680 |
| 24 | 6 | 0 | -0.690086 | -3.943341 | -2.360895 |
| 25 | 6 | 0 | 0.657796  | -3.950540 | -2.358127 |
| 26 | 6 | 0 | 1.324850  | -4.463127 | -1.307198 |
| 27 | 6 | 0 | 2.412840  | -3.830966 | -0.827249 |
| 28 | 6 | 0 | 0.647204  | -4.973175 | -0.261252 |
| 29 | 6 | 0 | -0.698953 | -4.965988 | -0.263992 |
| 30 | 6 | 0 | 1.319076  | -4.661590 | 0.863524  |
| 31 | 6 | 0 | 0.646578  | -4.353847 | 1.988129  |
| 32 | 6 | 0 | -0.700862 | -4.346643 | 1.985395  |
| 33 | 6 | 0 | -1.372016 | -4.647200 | 0.858051  |
| 34 | 6 | 0 | -2.452916 | -3.925676 | 0.504101  |
| 35 | 6 | 0 | -2.847787 | -2.893622 | 1.273751  |
| 36 | 6 | 0 | -2.186310 | -2.598796 | 2.404807  |
| 37 | 6 | 0 | -1.115279 | -3.331690 | 2.767841  |
| 38 | 6 | 0 | -0.021018 | -2.722196 | 3.261357  |
| 39 | 6 | 0 | 1.068639  | -3.343355 | 2.772243  |
| 40 | 6 | 0 | 2.148936  | -2.621983 | 2.413579  |
| 41 | 6 | 0 | 2.811846  | -2.923895 | 1.285247  |
| 42 | 6 | 0 | 2.409076  | -3.951684 | 0.513990  |
| 43 | 6 | 0 | 3.181000  | -1.760918 | 0.717927  |
| 44 | 6 | 0 | 2.723269  | -0.725952 | 1.445664  |
| 45 | 6 | 0 | 2.136637  | -1.279890 | 2.525439  |
| 46 | 6 | 0 | 1.066112  | -0.672757 | 3.050367  |
| 47 | 6 | 0 | -0.014158 | -1.386611 | 3.406961  |
| 48 | 6 | 0 | -1.085262 | -0.661232 | 3.046019  |
| 49 | 6 | 0 | -2.160098 | -1.256914 | 2.516770  |
| 50 | 6 | 0 | -2.736290 | -0.696806 | 1.434568  |

Standard orientation:

| Center Number | Atomic Number | Atomic Type | Coordinates (Angstroms) |           |           |
|---------------|---------------|-------------|-------------------------|-----------|-----------|
|               |               |             | X                       | Y         | Z         |
| 1             | 6             | 0           | 1.610116                | 1.521316  | -1.074288 |
| 2             | 6             | 0           | 0.695527                | 0.984794  | -1.931577 |
| 3             | 6             | 0           | -0.676917               | 0.992180  | -1.934432 |
| 4             | 6             | 0           | -1.589252               | 1.538540  | -1.080927 |
| 5             | 6             | 0           | -2.378559               | 0.611112  | -0.468902 |
| 6             | 6             | 0           | -2.756902               | -0.475781 | -1.168583 |
| 7             | 6             | 0           | -2.157456               | -0.804356 | -2.321192 |
| 8             | 6             | 0           | -1.053652               | -0.107128 | -2.621818 |
| 9             | 6             | 0           | 0.002353                | -0.769462 | -3.099471 |
| 10            | 6             | 0           | 1.063399                | -0.118466 | -2.617428 |
| 11            | 6             | 0           | 2.158486                | -0.827395 | -2.312299 |
| 12            | 6             | 0           | 2.756930                | -0.505158 | -1.157381 |
| 13            | 6             | 0           | 2.387451                | 0.585783  | -0.459224 |
| 14            | 6             | 0           | 3.188564                | -1.650966 | -0.613890 |
| 15            | 6             | 0           | 2.822590                | -2.681980 | -1.395545 |
| 16            | 6             | 0           | 2.167816                | -2.168384 | -2.452336 |
| 17            | 6             | 0           | 1.084748                | -2.808850 | -2.931668 |



|    |   |   |           |           |           |     |   |   |           |          |           |
|----|---|---|-----------|-----------|-----------|-----|---|---|-----------|----------|-----------|
| 51 | 6 | 0 | -3.202175 | -1.726792 | 0.704948  | 87  | 1 | 0 | 3.858080  | 5.580231 | 2.487188  |
| 52 | 6 | 0 | -3.203097 | -1.616838 | -0.626882 | 88  | 1 | 0 | 5.914815  | 4.879627 | 1.361321  |
| 53 | 6 | 0 | -2.330730 | 0.482515  | 0.895813  | 89  | 1 | 0 | -5.860861 | 4.951211 | 1.345054  |
| 54 | 6 | 0 | -1.330457 | 1.146493  | 1.544745  | 90  | 1 | 0 | -3.794777 | 5.645079 | 2.457239  |
| 55 | 6 | 0 | -0.674609 | 0.502148  | 2.525083  | 91  | 1 | 0 | -1.670904 | 4.628764 | 1.731779  |
| 56 | 6 | 0 | 0.670022  | 0.494914  | 2.527792  | 92  | 1 | 0 | 1.256715  | 4.513270 | -1.649260 |
| 57 | 6 | 0 | 1.336670  | 1.132097  | 1.550084  | 93  | 1 | 0 | -7.447734 | 3.263581 | 1.040397  |
| 58 | 6 | 0 | 2.332602  | 0.457652  | 0.905285  | 94  | 1 | 0 | -7.981563 | 2.103984 | -0.206086 |
| 59 | 6 | 0 | -0.663220 | 2.124661  | 0.904025  | 95  | 1 | 0 | -6.621779 | 1.674796 | 0.888567  |
| 60 | 6 | 0 | 0.682504  | 2.117325  | 0.906717  | 96  | 1 | 0 | -5.040668 | 2.355381 | -2.514842 |
| 61 | 6 | 0 | 1.403314  | 2.756310  | -0.236538 | 97  | 1 | 0 | -6.663589 | 1.652002 | -2.262373 |
| 62 | 6 | 0 | -1.372485 | 2.771146  | -0.242269 | 98  | 1 | 0 | -5.300713 | 1.099272 | -1.246383 |
| 63 | 6 | 0 | -0.643118 | 3.826052  | -1.012538 | 99  | 1 | 0 | -7.054440 | 5.089098 | -0.759019 |
| 64 | 6 | 0 | 2.683182  | 3.402947  | 0.273432  | 100 | 1 | 0 | -6.003761 | 4.735287 | -2.172903 |
| 65 | 6 | 0 | 2.668750  | 4.301983  | 1.271386  | 101 | 1 | 0 | -7.617604 | 3.957193 | -2.023472 |
| 66 | 6 | 0 | 3.828234  | 4.841575  | 1.669948  | 102 | 1 | 0 | 5.061596  | 2.378658 | -2.542927 |
| 67 | 6 | 0 | 4.949783  | 4.452762  | 1.047388  | 103 | 1 | 0 | 6.672132  | 1.639834 | -2.309608 |
| 68 | 6 | 0 | 4.875959  | 3.551640  | 0.051670  | 104 | 1 | 0 | 5.298259  | 1.080578 | -1.312846 |
| 69 | 6 | 0 | -2.646069 | 3.433255  | 0.263900  | 105 | 1 | 0 | 6.616605  | 1.571056 | 0.843263  |
| 70 | 7 | 0 | -3.727585 | 3.103056  | -0.305922 | 106 | 1 | 0 | 7.990935  | 2.007575 | -0.230194 |
| 71 | 6 | 0 | -4.838414 | 3.598076  | 0.048184  | 107 | 1 | 0 | 7.468251  | 3.140236 | 1.046560  |
| 72 | 6 | 0 | -4.900917 | 4.511500  | 1.033410  | 108 | 1 | 0 | 6.073348  | 4.728466 | -2.132789 |
| 73 | 6 | 0 | -3.774043 | 4.896997  | 1.648334  | 109 | 1 | 0 | 7.128288  | 5.020400 | -0.707894 |
| 74 | 6 | 0 | -2.620743 | 4.342468  | 1.252393  | 110 | 1 | 0 | 7.669907  | 3.912498 | -2.001572 |
| 75 | 7 | 0 | 3.759847  | 3.069714  | -0.303723 |     |   |   |           |          |           |
| 76 | 6 | 0 | 0.688611  | 3.819236  | -1.009362 |     |   |   |           |          |           |
| 77 | 6 | 0 | -6.074939 | 3.100583  | -0.699123 |     |   |   |           |          |           |
| 78 | 6 | 0 | -7.081705 | 2.508535  | 0.310180  |     |   |   |           |          |           |
| 79 | 6 | 0 | -5.747134 | 1.996632  | -1.732141 |     |   |   |           |          |           |
| 80 | 6 | 0 | -6.720570 | 4.283281  | -1.449917 |     |   |   |           |          |           |
| 81 | 6 | 0 | 6.105577  | 3.051907  | -0.705397 |     |   |   |           |          |           |
| 82 | 6 | 0 | 5.760729  | 1.984421  | -1.770719 |     |   |   |           |          |           |
| 83 | 6 | 0 | 7.094962  | 2.412890  | 0.292190  |     |   |   |           |          |           |
| 84 | 6 | 0 | 6.778376  | 4.241368  | -1.421103 |     |   |   |           |          |           |
| 85 | 1 | 0 | -1.201064 | 4.525894  | -1.655000 |     |   |   |           |          |           |
| 86 | 1 | 0 | 1.723022  | 4.591545  | 1.756795  |     |   |   |           |          |           |

-----

The total electronic energy  $E$  was calculated to be -3249.90224688 Hartree. The frequency calculations using the optimized structure showed no imaginary frequency. The LUMO level is -0.10769 a.u. (-2.93 eV).

**Table S4.** Optimized geometry of ICBA (*trans*-1) (B3LYP-D3/6-31G(d,p)).

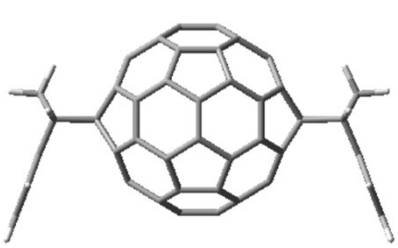

Standard orientation:

---

| Center Number | Atomic Number | Atomic Type | Coordinates (Angstroms) |           |           |
|---------------|---------------|-------------|-------------------------|-----------|-----------|
|               |               |             | X                       | Y         | Z         |
| 1             | 6             | 0           | -2.948313               | 1.491151  | 1.396319  |
| 2             | 6             | 0           | -2.432373               | 2.503505  | 0.673596  |
| 3             | 6             | 0           | -2.432380               | 2.503512  | -0.673574 |
| 4             | 6             | 0           | -2.948346               | 1.491175  | -1.396316 |
| 5             | 6             | 0           | -2.186654               | 1.044042  | -2.416165 |
| 6             | 6             | 0           | -1.091069               | 1.705245  | -2.832892 |
| 7             | 6             | 0           | -0.673774               | 2.803545  | -2.181113 |
| 8             | 6             | 0           | -1.345804               | 3.186705  | -1.082567 |
| 9             | 6             | 0           | -0.672195               | 3.608389  | 0.000021  |
| 10            | 6             | 0           | -1.345800               | 3.186708  | 1.082610  |
| 11            | 6             | 0           | -0.673766               | 2.803522  | 2.181156  |
| 12            | 6             | 0           | -1.091065               | 1.705215  | 2.832919  |
| 13            | 6             | 0           | -2.186630               | 1.044006  | 2.416191  |
| 14            | 6             | 0           | 0.000013                | 1.040788  | 3.253338  |
| 15            | 6             | 0           | 1.091123                | 1.705162  | 2.832921  |
| 16            | 6             | 0           | 0.673881                | 2.803481  | 2.181139  |
| 17            | 6             | 0           | 1.345942                | 3.186658  | 1.082615  |
| 18            | 6             | 0           | 0.672375                | 3.608384  | 0.000017  |
| 19            | 6             | 0           | 1.345945                | 3.186680  | -1.082585 |
| 20            | 6             | 0           | 0.673886                | 2.803527  | -2.181121 |
| 21            | 6             | 0           | 1.091121                | 1.705207  | -2.832917 |
| 22            | 6             | 0           | 2.186660                | 1.043942  | -2.416177 |
| 23            | 6             | 0           | 2.948354                | 1.491065  | -1.396316 |
| 24            | 6             | 0           | 2.432488                | 2.503448  | -0.673579 |
| 25            | 6             | 0           | 2.432502                | 2.503432  | 0.673604  |
| 26            | 6             | 0           | 2.948386                | 1.491038  | 1.396329  |
| 27            | 6             | 0           | 2.186677                | 1.043907  | 2.416191  |
| 28            | 6             | 0           | 3.744499                | 0.366940  | 0.770589  |
| 29            | 6             | 0           | 3.744481                | 0.366943  | -0.770570 |
| 30            | 6             | 0           | 2.949568                | -0.753087 | 1.400875  |
| 31            | 6             | 0           | 2.432826                | -1.762738 | 0.674022  |
| 32            | 6             | 0           | 2.432818                | -1.762714 | -0.674048 |
| 33            | 6             | 0           | 2.949538                | -0.753067 | -1.400876 |
| 34            | 6             | 0           | 2.187068                | -0.304228 | -2.418694 |
| 35            | 6             | 0           | 1.091168                | -0.965225 | -2.834727 |
| 36            | 6             | 0           | 0.673803                | -2.062956 | -2.181846 |
| 37            | 6             | 0           | 1.345654                | -2.445172 | -1.082727 |
| 38            | 6             | 0           | 0.672146                | -2.866481 | -0.000020 |
| 39            | 6             | 0           | 1.345655                | -2.445196 | 1.082702  |
| 40            | 6             | 0           | 0.673800                | -2.062987 | 2.181824  |
| 41            | 6             | 0           | 1.091167                | -0.965268 | 2.834718  |
| 42            | 6             | 0           | 2.187078                | -0.304268 | 2.418702  |
| 43            | 6             | 0           | -0.000019               | -0.300532 | 3.254127  |
| 44            | 6             | 0           | -1.091245               | -0.965233 | 2.834729  |
| 45            | 6             | 0           | -0.673946               | -2.062977 | 2.181838  |
| 46            | 6             | 0           | -1.345809               | -2.445172 | 1.082713  |
| 47            | 6             | 0           | -0.672322               | -2.866475 | -0.000014 |
| 48            | 6             | 0           | -1.345813               | -2.445151 | -1.082733 |
| 49            | 6             | 0           | -0.673951               | -2.062952 | -2.181863 |
| 50            | 6             | 0           | -1.091250               | -0.965189 | -2.834739 |
| 51            | 6             | 0           | -0.000030               | -0.300481 | -3.254130 |

|    |   |   |           |           |           |    |   |   |           |           |           |
|----|---|---|-----------|-----------|-----------|----|---|---|-----------|-----------|-----------|
| 52 | 6 | 0 | 0.000007  | 1.040841  | -3.253333 | 75 | 6 | 0 | -6.660325 | -3.062725 | 0.673129  |
| 53 | 6 | 0 | -2.187119 | -0.304141 | -2.418700 | 76 | 6 | 0 | -6.224541 | -1.995703 | 1.365264  |
| 54 | 6 | 0 | -2.949598 | -0.752942 | -1.400878 | 77 | 6 | 0 | 5.798170  | 1.273880  | 0.000005  |
| 55 | 6 | 0 | -2.432921 | -1.762613 | -0.674049 | 78 | 6 | 0 | -5.797976 | 1.274010  | 0.000033  |
| 56 | 6 | 0 | -2.432917 | -1.762636 | 0.674019  | 79 | 1 | 0 | -5.499827 | 0.674014  | 2.176114  |
| 57 | 6 | 0 | -2.949578 | -0.752960 | 1.400870  | 80 | 1 | 0 | -5.499838 | 0.674069  | -2.176100 |
| 58 | 6 | 0 | -2.187101 | -0.304165 | 2.418703  | 81 | 1 | 0 | 5.499867  | 0.674043  | 2.176103  |
| 59 | 6 | 0 | -3.744481 | 0.367073  | -0.770580 | 82 | 1 | 0 | 5.499858  | 0.674040  | -2.176098 |
| 60 | 6 | 0 | -3.744467 | 0.367068  | 0.770567  | 83 | 1 | 0 | 6.212206  | -1.985799 | 2.465961  |
| 61 | 6 | 0 | -5.239095 | 0.384303  | 1.138824  | 84 | 1 | 0 | 7.018255  | -3.952384 | 1.218333  |
| 62 | 6 | 0 | -5.239097 | 0.384318  | -1.138820 | 85 | 1 | 0 | 7.018189  | -3.952356 | -1.218430 |
| 63 | 6 | 0 | -5.794973 | -0.937634 | -0.668561 | 86 | 1 | 0 | 6.212102  | -1.985751 | -2.466000 |
| 64 | 6 | 0 | -5.794947 | -0.937643 | 0.668553  | 87 | 1 | 0 | -6.212218 | -1.985807 | -2.465977 |
| 65 | 6 | 0 | 5.795004  | -0.937670 | 0.668555  | 88 | 1 | 0 | -7.018412 | -3.952301 | -1.218362 |
| 66 | 6 | 0 | 5.239141  | 0.384281  | 1.138826  | 89 | 1 | 0 | -7.018360 | -3.952317 | 1.218365  |
| 67 | 6 | 0 | 5.239134  | 0.384290  | -1.138817 | 90 | 1 | 0 | -6.212119 | -1.985824 | 2.465971  |
| 68 | 6 | 0 | 5.794973  | -0.937649 | -0.668549 | 91 | 1 | 0 | 5.385308  | 2.307192  | 0.000008  |
| 69 | 6 | 0 | 6.224567  | -1.995720 | 1.365259  | 92 | 1 | 0 | 6.911228  | 1.332880  | -0.000001 |
| 70 | 6 | 0 | 6.660224  | -3.062772 | 0.673106  | 93 | 1 | 0 | -5.384789 | 2.307199  | 0.000025  |
| 71 | 6 | 0 | 6.660205  | -3.062785 | -0.673179 | 94 | 1 | 0 | -6.910995 | 1.333321  | 0.000032  |
| 72 | 6 | 0 | 6.224503  | -1.995705 | -1.365313 |    |   |   |           |           |           |
| 73 | 6 | 0 | -6.224578 | -1.995693 | -1.365278 |    |   |   |           |           |           |
| 74 | 6 | 0 | -6.660356 | -3.062718 | -0.673143 |    |   |   |           |           |           |

-----  
The total electronic energy  $E$  was calculated to be  $-2981.92613841$  Hartree. The frequency calculations using the optimized structure showed no imaginary frequency. The LUMO level is  $-0.10753$  a.u. ( $-2.92$  eV).

**Table S5.** Optimized geometry of C<sub>60</sub> (B3LYP-D3/6-31G(d,p)).

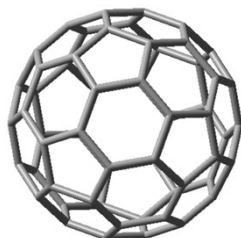

Standard orientation:

| Center Number | Atomic Number | Atomic Type | Coordinates (Angstroms) |           |           |
|---------------|---------------|-------------|-------------------------|-----------|-----------|
|               |               |             | X                       | Y         | Z         |
| 1             | 6             | 0           | 0.779447                | 1.878968  | -2.908465 |
| 2             | 6             | 0           | 0.069726                | 0.809541  | -3.455544 |
| 3             | 6             | 0           | 0.647318                | -0.524052 | -3.449958 |
| 4             | 6             | 0           | 1.911880                | -0.734984 | -2.899444 |
| 5             | 6             | 0           | 2.651717                | 0.379287  | -2.330467 |
| 6             | 6             | 0           | 2.096399                | 1.659337  | -2.334423 |
| 7             | 6             | 0           | 2.223544                | 2.510796  | -1.163287 |
| 8             | 6             | 0           | 0.984745                | 3.256455  | -1.013637 |
| 9             | 6             | 0           | 0.092108                | 2.865652  | -2.092220 |
| 10            | 6             | 0           | -1.277508               | 2.743843  | -1.855532 |
| 11            | 6             | 0           | -2.016753               | 1.629425  | -2.424882 |
| 12            | 6             | 0           | -1.356957               | 0.682231  | -3.208788 |
| 13            | 6             | 0           | -1.661143               | -0.730327 | -3.050895 |
| 14            | 6             | 0           | -0.422533               | -1.475890 | -3.200657 |
| 15            | 6             | 0           | -0.184980               | -2.600012 | -2.409071 |
| 16            | 6             | 0           | 1.132072                | -2.819563 | -1.834884 |
| 17            | 6             | 0           | 2.159185                | -1.906189 | -2.075068 |
| 18            | 6             | 0           | 3.051719                | -1.515875 | -0.996331 |
| 19            | 6             | 0           | 3.355936                | -0.103308 | -1.154014 |
| 20            | 6             | 0           | 3.477891                | 0.713952  | -0.029564 |
| 21            | 6             | 0           | 2.899910                | 2.047619  | -0.034269 |
| 22            | 6             | 0           | 2.365593                | 2.310795  | 1.291836  |
| 23            | 6             | 0           | 1.176402                | 3.026472  | 1.435573  |
| 24            | 6             | 0           | 0.471854                | 3.508526  | 0.259123  |
| 25            | 6             | 0           | -0.954853               | 3.381315  | 0.506082  |
| 26            | 6             | 0           | -1.811963               | 3.007075  | -0.529591 |
| 27            | 6             | 0           | -2.881400               | 2.054809  | -0.279390 |
| 28            | 6             | 0           | -3.007787               | 1.203450  | -1.450690 |
| 29            | 6             | 0           | -3.299880               | -0.152497 | -1.299391 |
| 30            | 6             | 0           | -2.612692               | -1.139236 | -2.115918 |
| 31            | 6             | 0           | -2.365610               | -2.310843 | -1.291724 |
| 32            | 6             | 0           | -1.176413               | -3.026508 | -1.435464 |
| 33            | 6             | 0           | -0.471848               | -3.508699 | -0.259106 |
| 34            | 6             | 0           | 0.954886                | -3.381262 | -0.506163 |
| 35            | 6             | 0           | 1.811963                | -3.007059 | 0.529515  |
| 36            | 6             | 0           | 2.881385                | -2.054802 | 0.279387  |
| 37            | 6             | 0           | 3.007800                | -1.203419 | 1.450631  |
| 38            | 6             | 0           | 3.299897                | 0.152498  | 1.299304  |
| 39            | 6             | 0           | 2.612843                | 1.139248  | 2.116044  |
| 40            | 6             | 0           | 1.661146                | 0.730303  | 3.050833  |
| 41            | 6             | 0           | 0.422509                | 1.475875  | 3.200570  |
| 42            | 6             | 0           | 0.184952                | 2.600127  | 2.409201  |
| 43            | 6             | 0           | -1.132086               | 2.819593  | 1.834788  |
| 44            | 6             | 0           | -2.159170               | 1.906235  | 2.075011  |
| 45            | 6             | 0           | -3.051692               | 1.515862  | 0.996325  |
| 46            | 6             | 0           | -3.355917               | 0.103322  | 1.153947  |
| 47            | 6             | 0           | -3.477882               | -0.713890 | 0.029500  |
| 48            | 6             | 0           | -2.900077               | -2.047700 | 0.034315  |
| 49            | 6             | 0           | -2.223528               | -2.510730 | 1.163268  |
| 50            | 6             | 0           | -0.984707               | -3.256392 | 1.013600  |
| 51            | 6             | 0           | -0.092090               | -2.865864 | 2.092256  |
| 52            | 6             | 0           | 1.277489                | -2.743861 | 1.855461  |

|    |   |   |           |           |          |
|----|---|---|-----------|-----------|----------|
| 53 | 6 | 0 | 2.016802  | -1.629388 | 2.424870 |
| 54 | 6 | 0 | 1.357135  | -0.682243 | 3.208950 |
| 55 | 6 | 0 | -0.069743 | -0.809554 | 3.455460 |
| 56 | 6 | 0 | -0.779432 | -1.878952 | 2.908490 |
| 57 | 6 | 0 | -2.096602 | -1.659429 | 2.334510 |
| 58 | 6 | 0 | -2.651768 | -0.379309 | 2.330440 |
| 59 | 6 | 0 | -1.911872 | 0.735054  | 2.899444 |
| 60 | 6 | 0 | -0.647369 | 0.524174  | 3.450103 |

---

The total electronic energy  $E$  was calculated to be  $-2285.953805$  Hartree. The frequency calculations using the optimized structure showed no imaginary frequency. The LUMO level is  $-0.11848$  a.u. ( $-3.22$  eV).

## References

- (1) K. Kurotobi and Y. Murata, *Science*, 2011, **333**, 613–616.
- (2) J. Dacuña, *Phys. Rev. B*, 2011, **84**, 195209.
- (3) J. C. Blakesley, F. A. Castro, W. Kylberg, G. F. A. Dibb, C. Arantes, R. Valaski, M. Cremona, J. S. Kim and J.-S. Kim, *Org. Electron.*, 2014, **15**, 1263–1272.
